# Supplementary material
Source: publisher site journal article supplement (https://www.dovepress.com/get_supplementary_file.php?f=362148.docx)
Supplement: Supplementary file 1 [file get_supplementary_file.php]

**Supplementary table 1. The list of 159 disease-associated genes in Angel Care panel**

| **Types** | **Disease** | **Genes** |
| --- | --- | --- |
| Amino acid metabolic disease | Phenylketonuria | *PAH* |
| Hyperphenylalaninemia, BH4-deficient, A | *PTS* |
| BH4-Deficient Hyperphenylalaninemia C | *QDPR* |
| Carbamoylphosphate Synthetase I Deficiency | *CPS1* |
| Maple Syrup Urine Disease Type 1A | *BCKDHA* |
| Maple Syrup Urine Disease Type 1B | *BCKDHB* |
| Maple Syrup Urine Disease, Type 2 | *DBT* |
| Glycine encephalopathy | *AMT* |
| *GLDC* |
| Hypermethioninemia | *MAT1A* |
| Hyperornithinemia-Hyperammonemia-Homocitrullinuria Syndrome | *SLC25A15* |
| Hyperprolinemia type I | *PRODH* |
| Homocystinuria Due to Cystathionine Beta-Synthase Deficiency | *CBS* |
| Homocystinuria due to MTHFR deficiency | *MTHFR* |
| Citrin Deficiency | *SLC25A13* |
| Citrullinemia | *ASS1* |
| Argininosuccinic aciduria | *ASL* |
| Argininemia | *ARG1* |
| Tyrosinemia Type 1 | *FAH* |
| Tyrosinemia Type 2 | *TAT* |
| Tyrosinemia Type 3 | *HPD* |
| Ornithine Transcarbamylase Deficiency | *OTC* |
| Organic acid metabolic disease | 2-Methylbutyryl Glycinuria | *ACADSB* |
| 3-Methylcrotonyl-CoA carboxylase 1 deficiency | *MCCC1* |
| 3-Methylcrotonyl-CoA carboxylase 2 deficiency | *MCCC2* |
| 3-Methylglutaconic Aciduria type 1 | *AUH* |
| 3-hydroxy-3-methylglutaryl-CoA lyase deficiency | *HMGCL* |
| Beta-Ketothiolase Deficiency | *ACAT1* |
| Malonyl-Coa Decarboxylase Deficiency | *MLYCD* |
| Propionicacidemia | *PCCA* |
| *PCCB* |
| Succinic Semialdehyde Dehydrogenase Deficiency | *ALDH5A1* |
| MMAA-Related Methylmalonic Acidemia cblA type | *MMAA* |
| MMAB-Related Methylmalonic Acidemia cblB type | *MMAB* |
| MMAB-Related Methylmalonic Acidemia cblC type | *MMACHC* |
| MUT-Related Methylmalonic Acidemia | *MMUT* |
| Holocarboxylase synthetase deficiency | *HLCS* |
| Biotinidase Deficiency | *BTD* |
| Glutaric Acidemia I | *GCDH* |
| Isobutyryl-CoA dehydrogenase deficiency | *ACAD8* |
| Isovaleric Acidemia | *IVD* |
| Fatty acid metabolic disease | 2,4-Dienoyl-CoA Reductase Deficiency | *NADK2* |
| Acyl-CoA Dehydrogenase Deficiency,Short-Chain | *ACADS* |
| Glutaric acidemia IIC | *ETFDH* |
| Acyl-CoA Dehydrogenase Deficiency,Very Long-Chain | *ACADVL* |
| Carnitine-Acylcarnitine Translocase Deficiency | *SLC25A20* |
| Carnitine Palmitoyltransferase I Deficiency | *CPT1A* |
| Carnitine palmitoyltransferase II deficiency, myopathic form | *CPT2* |
| Trifunctional Protein Deficiency | *HADHA* |
| *HADHB* |
| Primary Carnitine Deficiency | *SLC22A5* |
| Long-Chain 3-Hydroxyacyl-Coa Dehydrogenase Deficiency | *HADHA* |
| Acyl-CoA Dehydrogenase Deficiency,Medium-Chain | *ACADM* |
| Lysosomal storage disease | Krabbe Disease | *GALC* |
| Fabry Disease | *GLA* |
| Niemann-Pick Disease Type A/B | *SMPD1* |
| Niemann-Pick Disease Type C1 | *NPC1* |
| Niemann-Pick Disease Type C2 | *NPC2* |
| Mucopolysaccharidosis I | *IDUA* |
| Mucopolysaccharidosis II | *IDS* |
| Mucopolysaccharidosis IIIA | *SGSH* |
| Mucopolysaccharidosis IIIB | *NAGLU* |
| Mucopolysaccharidosis IVA | *GALNS* |
| Mucopolysaccharidosis IVB | *GLB1* |
| Mucopolysaccharidosis VI | *ARSB* |
| Mucopolysaccharidosis VII | *GUSB* |
| Glycometabolic disease | Galactokinase Deficiency | *GALK1* |
| Galactosemia | *GALT* |
| Epimerase Deficiency Galactosemia | *GALE* |
| Familial Hyperinsulinemic Hypoglycemia 5 | *INSR* |
| Glycogen Storage Disease Type Ia | *G6PC* |
| Glycogen Storage Disease Type Ib/Ic | *SLC37A4* |
| Glycogen Storage Disease Type II | *GAA* |
| Glycogen Storage Disease Type III | *AGL* |
| Glycogen Storage Disease type IV | *GBE1* |
| Glycogen Storage Disease type V | *PYGM* |
| Glycogen Storage Disease type VI | *PYGL* |
| Glycogen Storage Disease type Ixa | *PHKA2* |
| Glycogen Storage Disease type Ixb | *PHKB* |
| Glycogen Storage Disease type Ixc | *PHKG2* |
| Glycogen Storage Disease type Ixd | *PHKA1* |
| Glycogen Storage Disease type X IV | *PGM1* |
| Lipometabolic disease | Sitosterolemia type I | *ABCG8* |
| Sitosterolemia type II | *ABCG5* |
| Familial Hypercholesterolemia type1 | *LDLR* |
| Cerebrotendinous xanthomatosis | *CYP27A1* |
| Other metabolic diseases | Menkes Disease | *ATP7A* |
| X-Linked Hypophosphatemia | *PHEX* |
| Wilson Disease | *ATP7B* |
| Progressive Familial Intrahepatic Cholestasis 1 | *ATP8B1* |
| Progressive Familial Intrahepatic Cholestasis 2 | *ABCB11* |
| Progressive Familial Intrahepatic Cholestasis 3 | *ABCB4* |
| Glucose-6-Phosphate Dehydrogenase Deficiency | *G6PD* |
| Congenital Bile Acid Synthesis Defect 1 | *HSD3B7* |
| Hypophosphatasia | *ALPL* |
| Hearing loss | Autosomal Recessive Deafness 4, with Enlarged Vestibular Aqueduct | *SLC26A4* |
| Usher Syndrome Type IB | *MYO7A* |
| Usher Syndrome Type IF | *PCDH15* |
| Usher Syndrome Type IIA | *USH2A* |
| Aminoglycoside-Induced Deafness | *MT-RNR1* |
| Autosomal Recessive Deafness 12 | *CDH23* |
| Autosomal Recessive Deafness 1A | *GJB2* |
| Autosomal Recessive Deafness 3 | *MYO15A* |
| Autosomal Recessive Deafness 7 | *TMC1* |
| Autosomal Recessive Deafness 8&10 | *TMPRSS3* |
| Autosomal Recessive Deafness 9 | *OTOF* |
| Immune diseases | Wiskott-Aldrich Syndrome 1 | *WAS* |
| X-Linked Lymphoproliferative syndrome 1 | *SH2D1A* |
| X-Linked Lymphoproliferative syndrome 2 | *XIAP* |
| X-Linked Agammaglobulinemia 1 | *BTK* |
| X-linked Chronic Granulomatous Disease | *CYBB* |
| X-Linked Severe Combined Immunodeficiency | *IL2RG* |
| Severe combined immunodeficiency, B cell-negative | *RAG1* |
| Familial Mediterranean Fever | *MEFV* |
| Immunodeficiency with Hyper-IgM, type 1 | *CD40LG* |
| Autosomal Dominant Severe Congenital Neutropenia 1 | *ELANE* |
| Endocrine diseases | Congenital Adrenal Hyperplasia due to 11-beta-Hydroxylase-Deficiency | *CYP11B1* |
| Congenital Adrenal Hyperplasia due to 17-alpha Hydroxylase Deficiency | *CYP17A1* |
| Kallmann Syndrome 1 | *ANOS1* |
| Kallmann Syndrome 2 | *FGFR1* |
| Kallmann Syndrome 3 | *PROKR2* |
| Kallmann Syndrome 5 | *CHD7* |
| X-Linked Adrenal Hypoplasia Congenita | *NR0B1* |
| Thyroid dyshormonogenesis 5 | *DUOXA2* |
| Thyroid dyshormonogenesis 6 | *DUOX2* |
| Combined pituitary hormone deficiency 2 | *PROP1* |
| Hypothyroidism Congenital Nongoitrous 1 | *TSHR* |
| Familial Hyperinsulinemic Hypoglycemia 2 | *KCNJ11* |
| Familial Hyperinsulinemic Hypoglycemia 3 | *ABCC8* |
| Neuromuscular diseases | Pyridoxine-Dependent Epilepsy | *ALDH7A1* |
| Autosomal Dominant Spastic paraplegia 31 | *REEP1* |
| Autosomal Dominant Spastic paraplegia 3A | *ATL1* |
| Autosomal Dominant Spastic paraplegia 4 | *SPAST* |
| Autosomal Dominant Spastic paraplegia 11 | *SPG11* |
| Myotonia Congenita | *CLCN1* |
| Duchenne Muscular Dystrophy | *DMD* |
| Spinal Muscular Atrophy | *SMN1* |
| Tyrosine Hydroxylase Deficiency | *TH* |
| Glucose Transporter Type 1 Deficiency Syndrome | *SLC2A1* |
| Developmental And Epileptic Encephalopathy 6 | *SCN1A* |
| Developmental And Epileptic Encephalopathy 9 | *PCDH19* |
| Hematological diseases | Diamond-Blackfan Anemia 10 | *RPS26* |
| Diamond-Blackfan Anemia 1 | *RPS19* |
| Diamond-Blackfan Anemia 7 | *RPL11* |
| Alpha-Thalassemia | *HBA1* |
| *HBA2* |
| Beta-Thalassemia | *HBB* |
| Fanconi anemia, complementation group A | *FANCA* |
| Familial Hemophagocytic Lymphohistiocytosis 2 | *PRF1* |
| Familial Hemophagocytic Lymphohistiocytosis 3 | *UNC13D* |
| Others | Gitelman syndrome | *SLC12A3* |
| Leber Hereditary Optic Neuropathy | *MT-ND4* |
| X-linked Alport Syndrome | *COL4A5* |
| Alport syndrome 2, autosomal recessive | *COL4A3* |
| Alport syndrome 3, autosomal recessive | *COL4A4* |
| Tuberous Sclerosis 1 | *TSC1* |
| Tuberous Sclerosis 2 | *TSC2* |
| Cystic Fibrosis | *CFTR* |
| Retinoblastoma | *RB1* |
| Primary Coenzyme Q10 deficiency 7 | *COQ4* |
